# Supplementary material for: Insights into excellent persistent luminescence and detecting trap distribution in BaHfSi3O9:Eu2+,Pr3+
Source: Royal Society of Chemistry journal article supplement (doi:10.1039/c7tc03579a), 2017-01-01
Supplement: c7tc03579a1.pdf [file c7tc03579a1.pdf]

## Supporting information

### Insighting Excellent Persistent Luminescence and Detecting Trap Distribution in BaHfSi<sub>3</sub>O<sub>9</sub>:Eu<sup>2+</sup>,Pr<sup>3+</sup>

Haijie Guo,<sup>ab</sup> Yuhua Wang,<sup>\*ab</sup> Gen Li,<sup>ab</sup> Jie Liu,<sup>ab</sup> Peng Feng<sup>ab</sup> and Dongwei Liu<sup>ab</sup>

<sup>a</sup> Department of Materials Science, School of Physical Science and Technology,

Lanzhou University, Lanzhou, 730000, P. R. China.

<sup>b</sup> Key Laboratory for Special Function Materials and Structural Design of the

Ministry of Education, Lanzhou University, Lanzhou 730000, China.

\* Corresponding author: wyh@lzu.edu.cn;

Fax: +86 931 8913554; Tel: +86 931 8912772

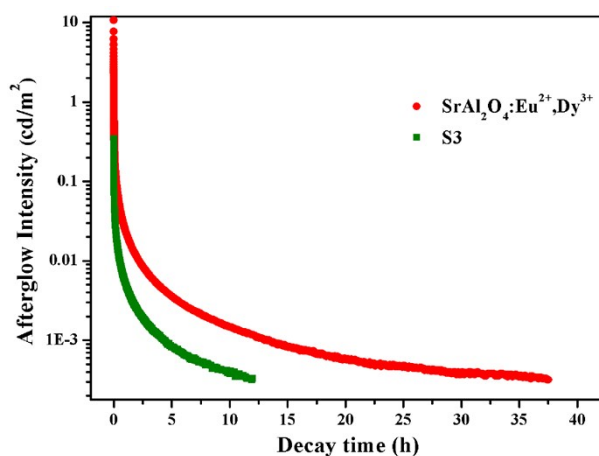

Fig. S1 Persistent decay curves of the S3 sample and SrAl<sub>2</sub>O<sub>4</sub>:Eu<sup>2+</sup>,Dy<sup>3+</sup>.

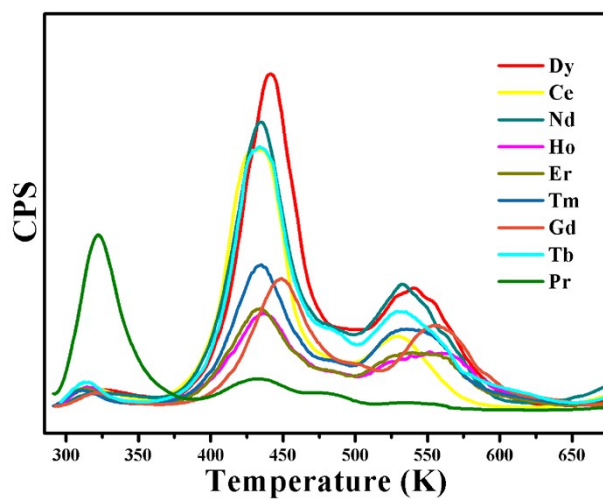

Fig. S2 The TL spectra of BaHfSi<sub>3</sub>O<sub>9</sub>:Eu<sup>2+</sup>,R<sup>3+</sup> (R=Dy, Ce, Nd, Ho, Er, Tm, Gd, Tb, Pr).

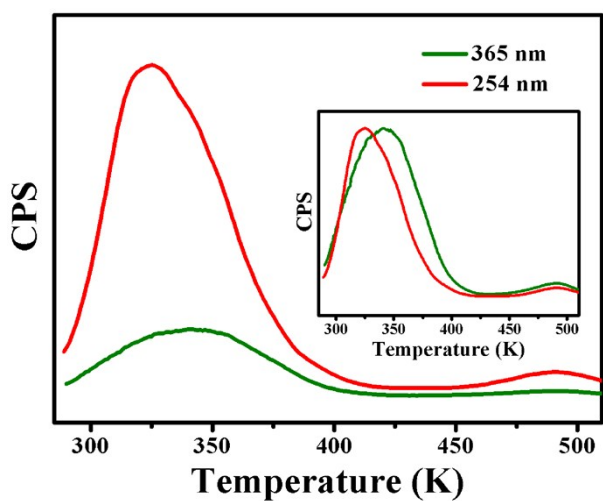

Fig. S3 TL glow curves of the S3 sample recorded after 254 nm or 365 nm lights excitation for 30 s.
